# Supplementary material for: Human Life History Strategies: Calibrated to External or Internal Cues?
Source: PubMed Central journal article supplement — Evol Psychol. 2016 Dec 17;15(1):1474704916677342. doi: 10.1177/1474704916677342 (PMC10638872; doi:10.1177/1474704916677342), 2016-12-17
Supplement: Supplementary_Material.pdf [file Supplementary_Material.pdf]

## Supplementary Material

Table S1

*Descriptives among Early Childhood and Current Environmental Harshness in Study 1 (MTurk Mothers) and Study 2 (Undergraduates)*

| Variable                          | Study 1 (MTurk Mothers) |           |                  | Study 2 (Undergraduates) |           |                  |
|-----------------------------------|-------------------------|-----------|------------------|--------------------------|-----------|------------------|
|                                   | <i>M</i>                | <i>SD</i> | Cronbach's alpha | <i>M</i>                 | <i>SD</i> | Cronbach's alpha |
| 1. Household income (0-7 years)   | 49088.80                | 34231.52  | -----            | 84030.56                 | 41924.11  | -----            |
| 2. Household income (current)     | 59146.23                | 37200.34  | -----            | 81339.38                 | 50984.05  | -----            |
| 3. Subjective SES (0-7 years)     | 11.50                   | 4.59      | .82              | 14.77                    | 4.32      | .82              |
| 4. Subjective SES (current)       | 10.84                   | 5.12      | .91              | 13.11                    | 4.80      | .85              |
| 5. SES combined (0-7 years)       | -.17                    | 1.70      | .82              | .09                      | 1.74      | .72              |
| 6. SES combined (current)         | -.14                    | 1.73      | .74              | .08                      | 1.72      | .66              |
| 7. Family neglect (0-7 years)     | 29.84                   | 9.89      | .87              | 24.81                    | 7.23      | .84              |
| 8. Family neglect (current)       | 20.81                   | 6.75      | .83              | 22.14                    | 7.96      | .88              |
| 9. Neighborhood crime (0-7 years) | 8.75                    | 3.21      | .85              | 7.89                     | 2.39      | .86              |
| 10. Neighborhood crime (current)  | 7.97                    | 2.48      | .88              | 7.72                     | 2.06      | .86              |

*Note.* N<sub>Study 1</sub> = 314. N<sub>Study 2</sub> = 505.

Table S2

*Bivariate Correlations among Early Childhood and Current Environmental Harshness in Study 1 (MTurk Mothers) and Study 2 (Undergraduates)*

| Variable                          | 1      | 2      | 3      | 4      | 5      | 6      | 7      | 8     | 9     | 10    |
|-----------------------------------|--------|--------|--------|--------|--------|--------|--------|-------|-------|-------|
| 1. Household income (0-7 years)   | -----  | .46**  | .70**  | .21**  | .92**  | .38**  | -.12*  | .00   | .00   | .04   |
| 2. Household income (current)     | .61**  | -----  | .26**  | .59**  | .39**  | .89**  | -.04   | .01   | .07   | .13*  |
| 3. Subjective SES (0-7 years)     | .57**  | .38**  | -----  | .23**  | .93**  | .28**  | -.26** | .00   | -.10  | .02   |
| 4. Subjective SES (current)       | .33**  | .50**  | .42**  | -----  | .24**  | .89**  | -.17** | -.10  | -.05  | .09   |
| 5. SES combined (0-7 years)       | .89**  | .56**  | .89**  | .42**  | -----  | .36**  | -.21** | .00   | -.06  | .03   |
| 6. SES combined (current)         | .55**  | .87**  | .46**  | .86*   | .57**  | -----  | -.12*  | -.05  | .01   | .12*  |
| 7. Family neglect (0-7 years)     | -.25** | -.23** | -.39** | -.31** | -.36** | -.31** | -----  | .36** | .49** | .33** |
| 8. Family neglect (current)       | -.25** | -.21** | -.39** | -.29** | -.36** | -.29** | .88**  | ----- | .29** | .35** |
| 9. Neighborhood crime (0-7 years) | -.22** | -.17** | -.30** | -.11*  | -.30** | -.16** | .47**  | .44** | ----- | .72** |
| 10. Neighborhood crime (current)  | -.14** | -.11*  | -.23** | -.13** | -.21** | -.14** | .38**  | .38** | .65** | ----- |

Note. <sup>a</sup>Variable included in Study 2. N<sub>Study 1</sub> = 314. N<sub>Study 2</sub> = 505. Above the diagonal is the bivariate correlation for Study 1. Below the diagonal is the bivariate correlation for Study 2.

\* $p < 0.05$  \*\* $p < 0.01$ .
